# Supplementary material for: Modulation of Paracellular Permeability in SARS-CoV-2 Blood-to-Brain Transcytosis
Source: MDPI journal article supplement (doi:10.3390/v16050785), 2024-05-15
Supplement: s1 [file s1]

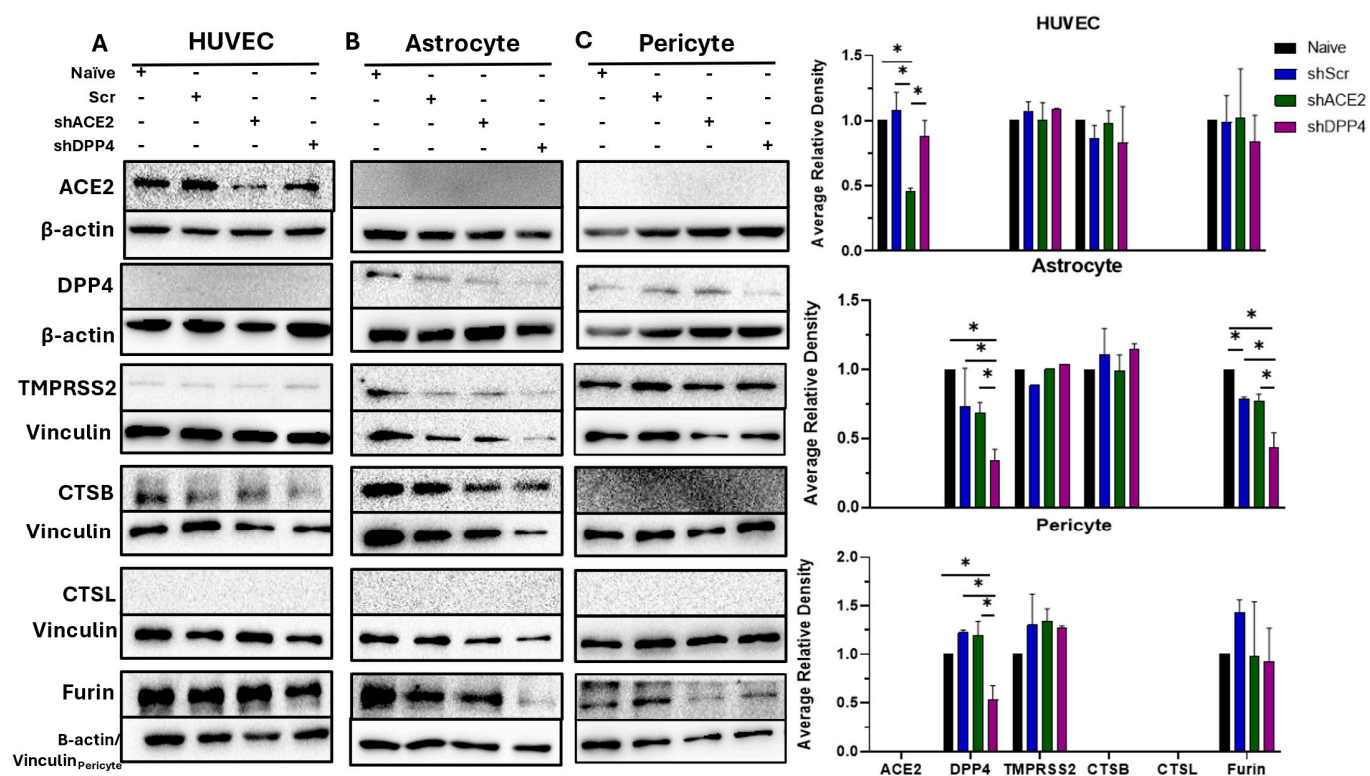

**Supplementary Figure 1.** Western Blots of receptors and proteases involved in SARS-CoV-2 infection and expression after shLentivirus. HUVECs, astrocytes and pericytes were exposed to scrambled- (Scr), shACE2-, or shDPP4-lentivirus for 48 hrs and cell pellet examined by western blotting for indicated proteins. Each target protein is aligned with a corresponding loading control of β-actin (45kDa), or vinculin (124 kDa). Densitometric analysis of the bands presented as well. \*  $p < 0.05$ , 2way ANOVA, post hoc Fisher's LSD test.

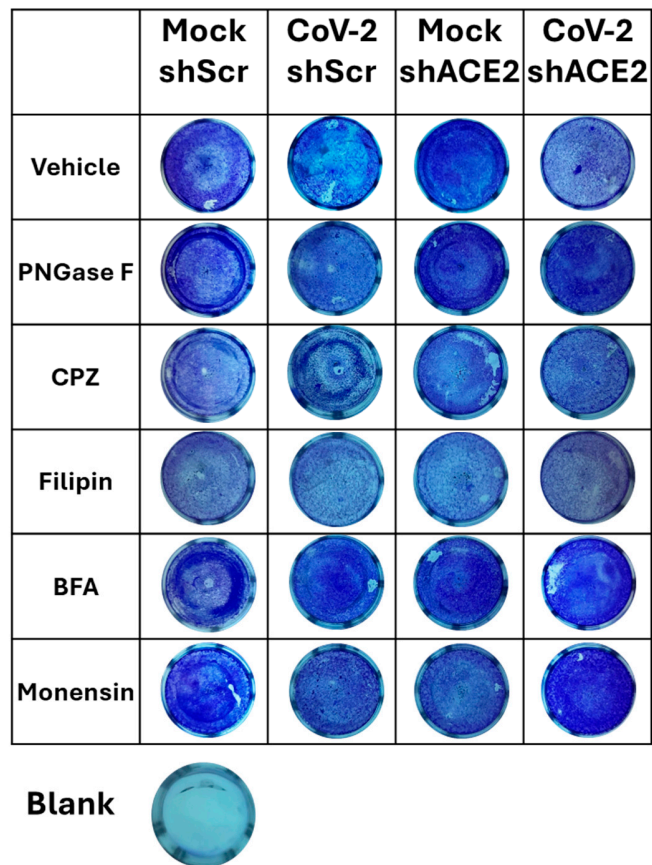

**Supplementary Figure 2.** Crystal Violet staining of transwells used in lentivirus and drug experiments demonstrating intact monolayers in upper well. Transwells were fixed and stained after 16-hour SARS-COV-2 infection.

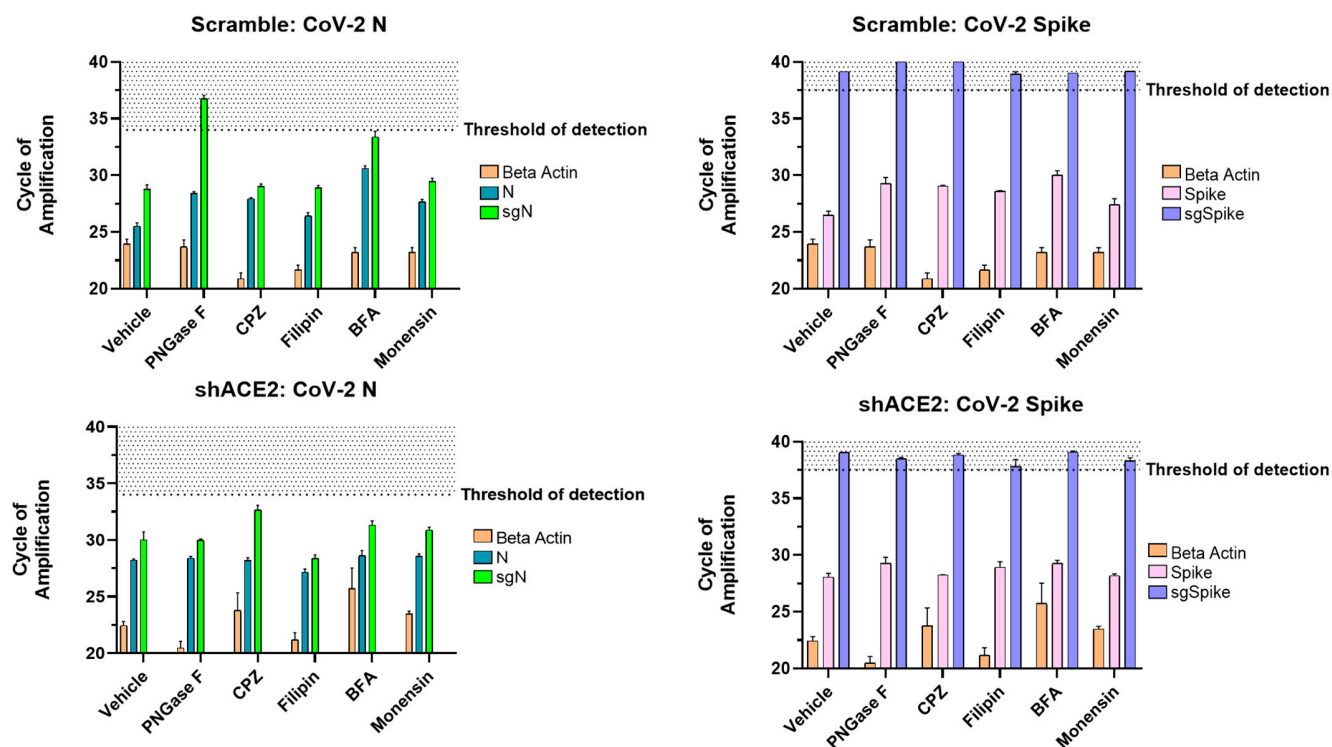

**Supplementary Figure 3.** Raw cycle of amplification values for genomic and subgenomic RNA from upper wells in lentivirus and drug experiments. The threshold of detection was established as 2 cycles below non-template control. Subgenomic N threshold = 34, and subgenomic spike threshold = 37.5. Subgenomic spike was not detected in any sample.
